# Supplementary material for: Mitochondrial phylogeny and distribution of cytoplasmic male sterility-associated genes in Beta vulgaris
Source: PubMed Central journal article supplement (PMC11432856; doi:10.1371/journal.pone.0308551), 2024-09-27

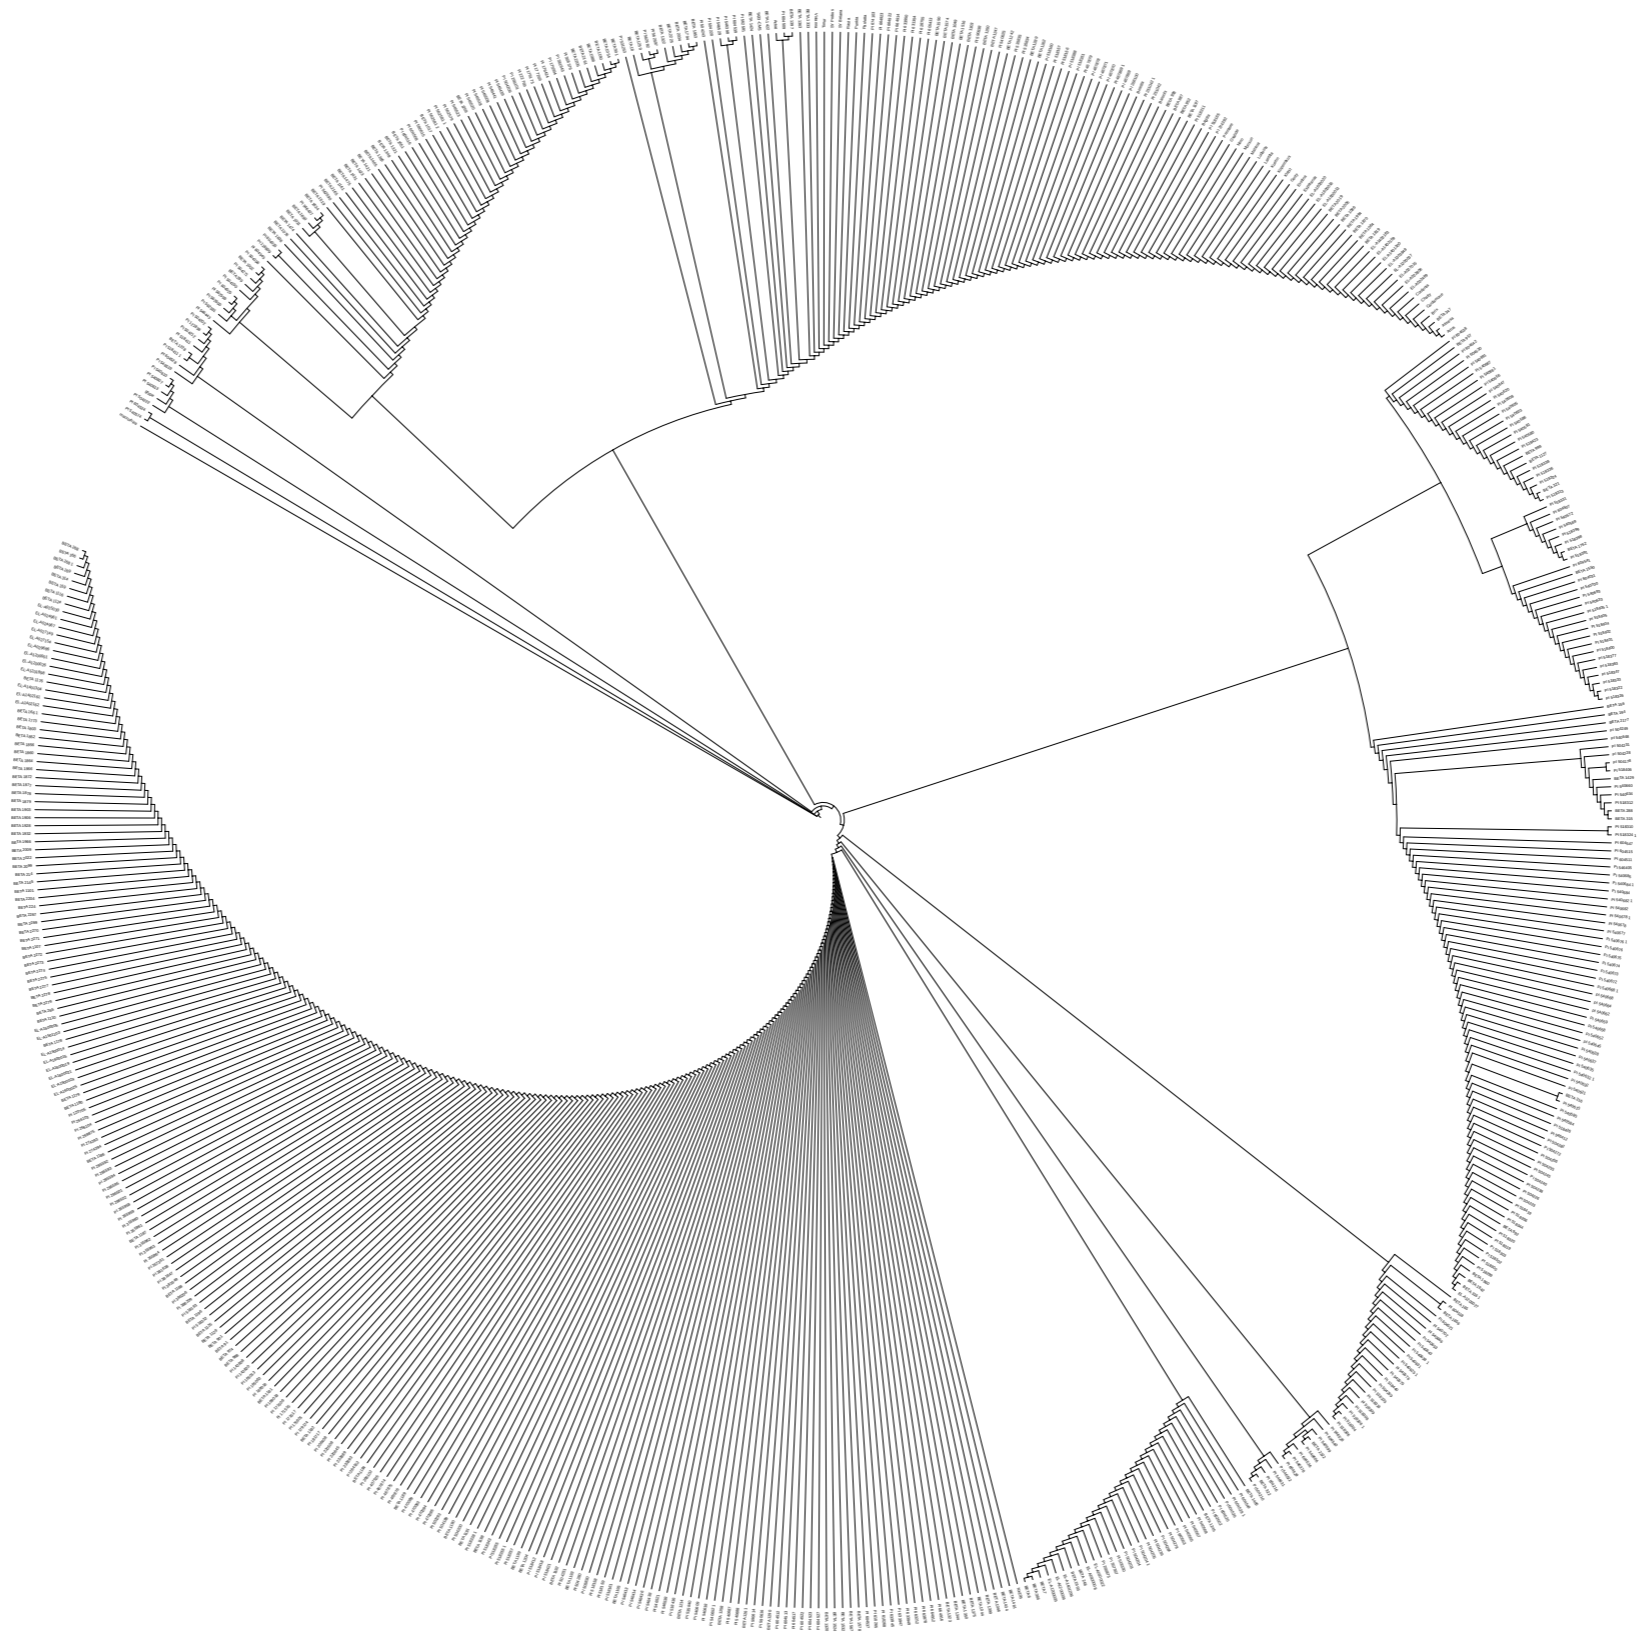

Supplement: pone.0308551.s004.pdf [file pone.0308551.s004.pdf]
